# Supplementary material for: Investigation of the effect of temperature on the structure of SARS-Cov-2 Spike Protein by Molecular Dynamics Simulations
Source: bioRxiv or medRxiv preprint supplement (doi:10.1101/2020.06.10.145086), 2020-06-19
Supplement: Supplementary file [file media-1.pdf]

# Investigation of the effect of temperature on the structure of SARS-Cov-2 Spike Protein by Molecular Dynamics Simulations

Soumya Lipsa Rath<sup>a\*</sup> and Kishant Kumar<sup>b</sup>

<sup>a</sup> Department of Biotechnology, National Institute of Technology Warangal (NIT W),

<sup>b</sup> Department of Chemical Engineering, National Institute of Technology Warangal (NIT W)  
Telangana, India, 506004.

Phone: +91 7978293479, Email: \*[slrath@nitw.ac.in](mailto:slrath@nitw.ac.in); [kishant@nitw.ac.in](mailto:kishant@nitw.ac.in)

**Table S1. List of systems studied**

| Serial No. | Temperature (in °C) | Simulation Time (ns) |
|------------|---------------------|----------------------|
| 1          | 10                  | 200                  |
| 2          | 20                  | 200                  |
| 3          | 30                  | 200                  |
| 4          | 40                  | 200                  |
| 5          | 50                  | 200                  |
| 6          | 70                  | 100                  |

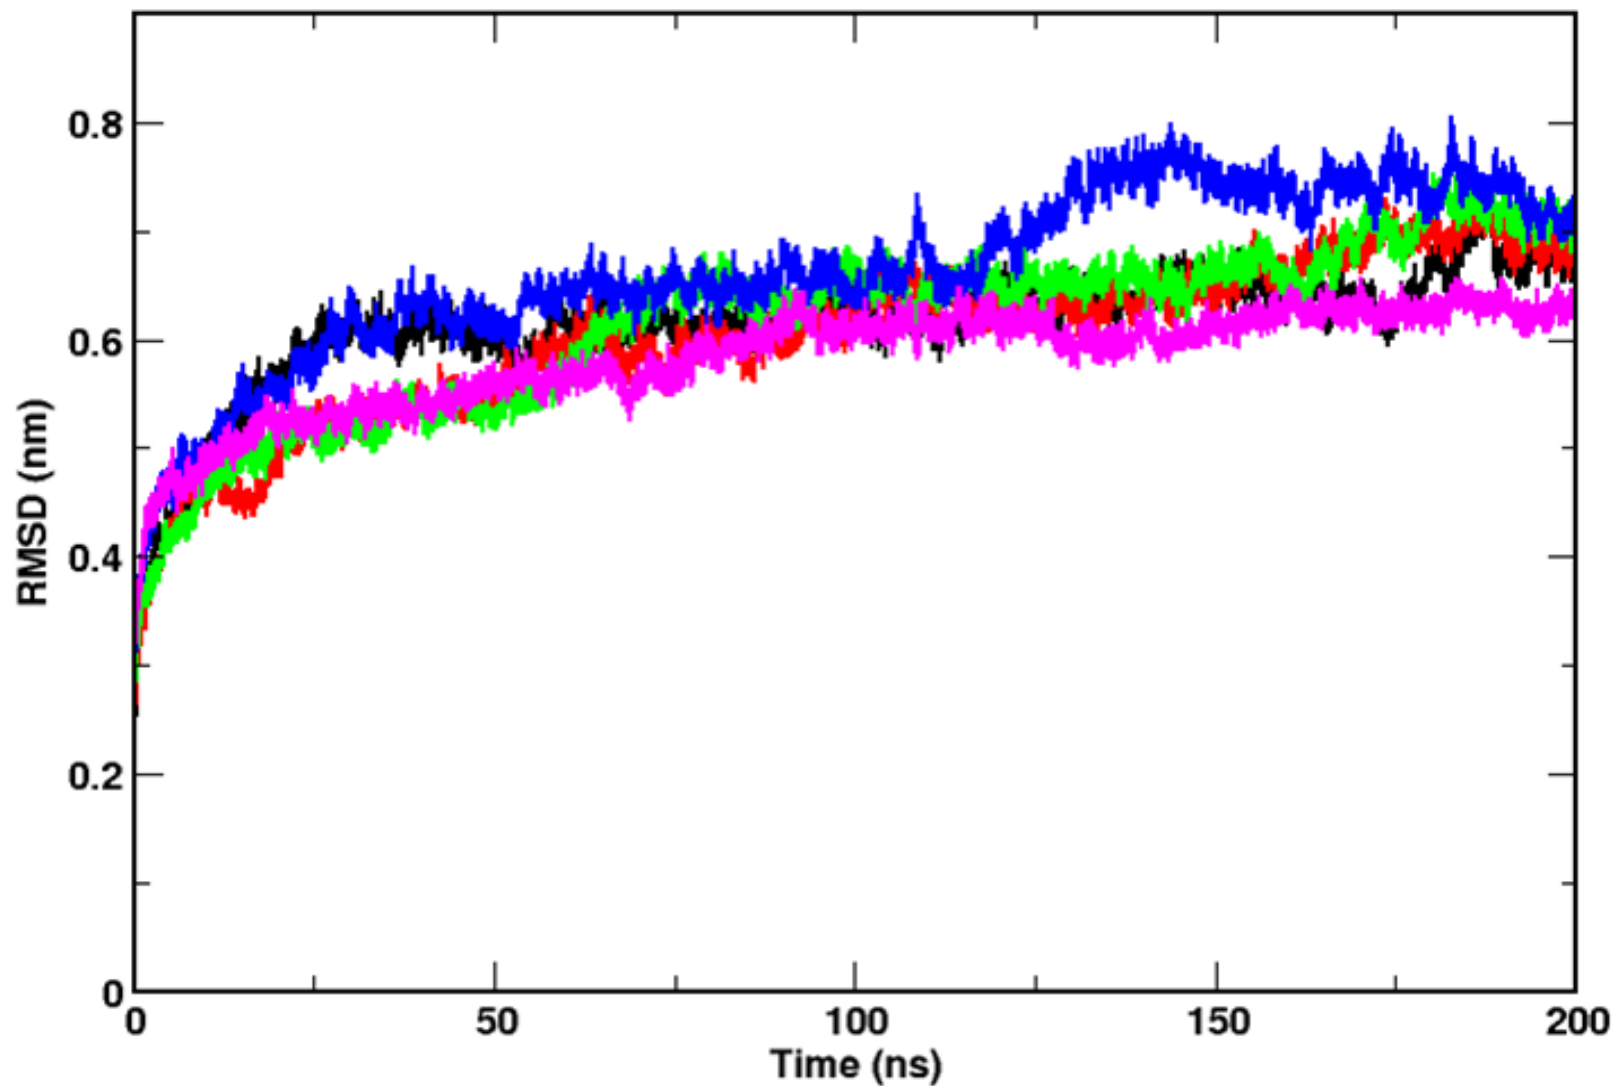

**Figure S1. Stability of the Spike protein across all temperatures.** RMSDs of Spike glycoprotein at 10 °C (black), 20 °C (red), 30 °C (green), 40 °C (blue) and 50 °C (magenta) during 200 ns of classical MD simulations showing stability of the simulations

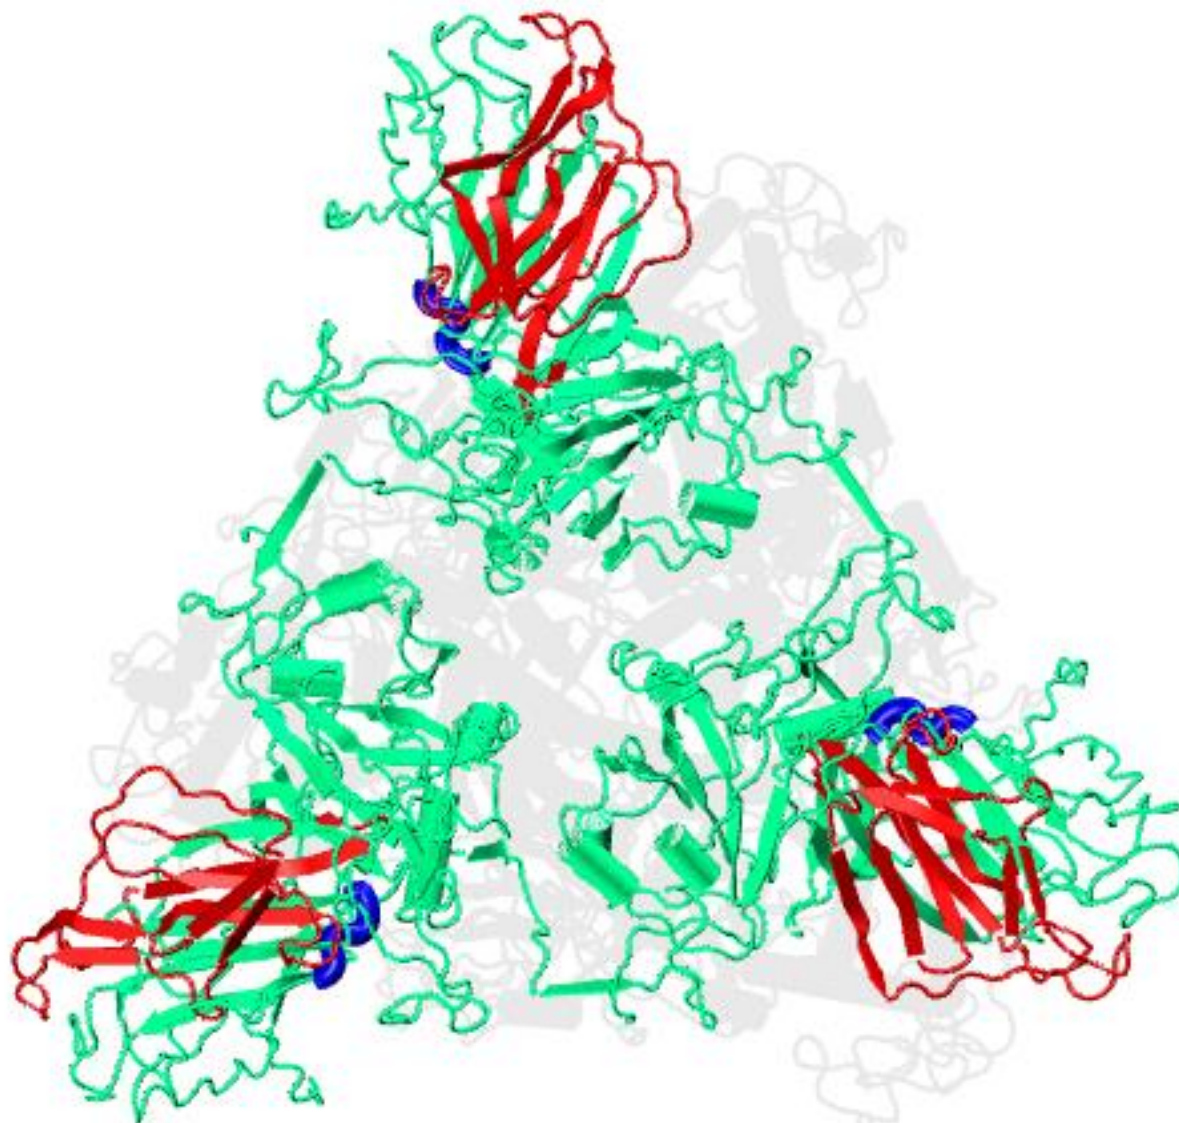

**Figure S2. Highly fluctuating regions in the N-Terminal Domain** Structure showing the S1 domain from top, highlighting the regions where peaks were observed in RMSF. The  $\beta 4$ - $\beta 5$  loop is shown in blue and the solvent exposed  $\beta 6$ - $\beta 12$  loop is shown in red

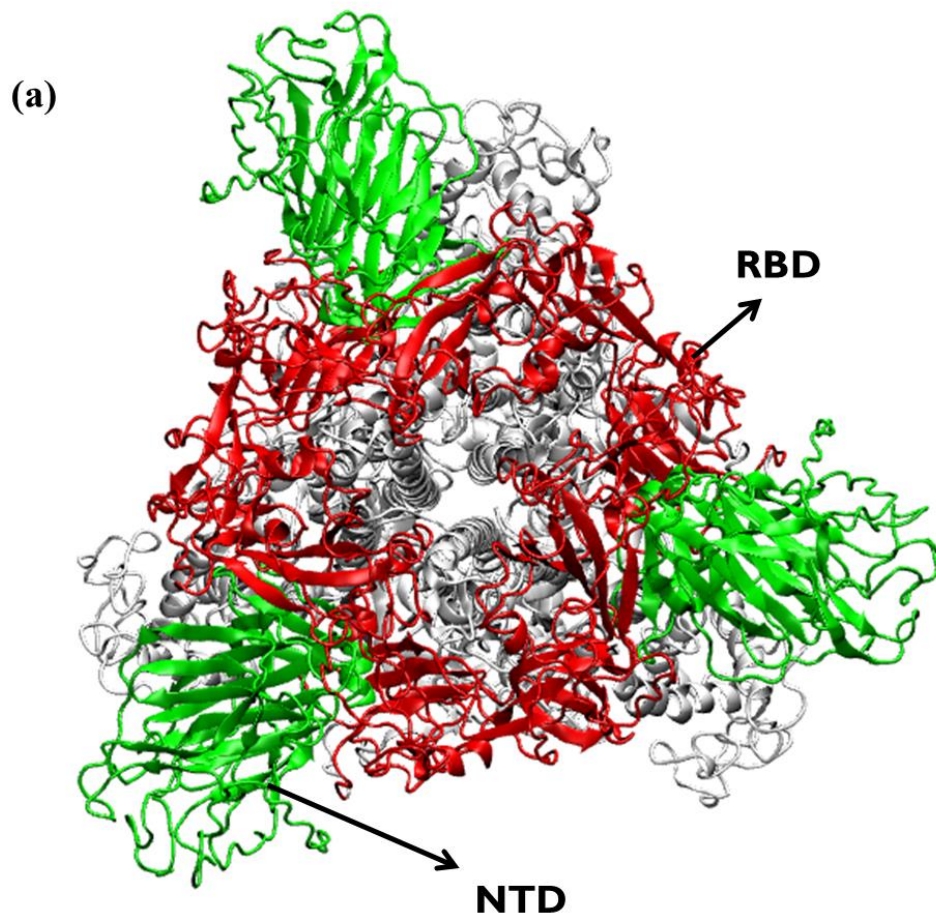

(b)

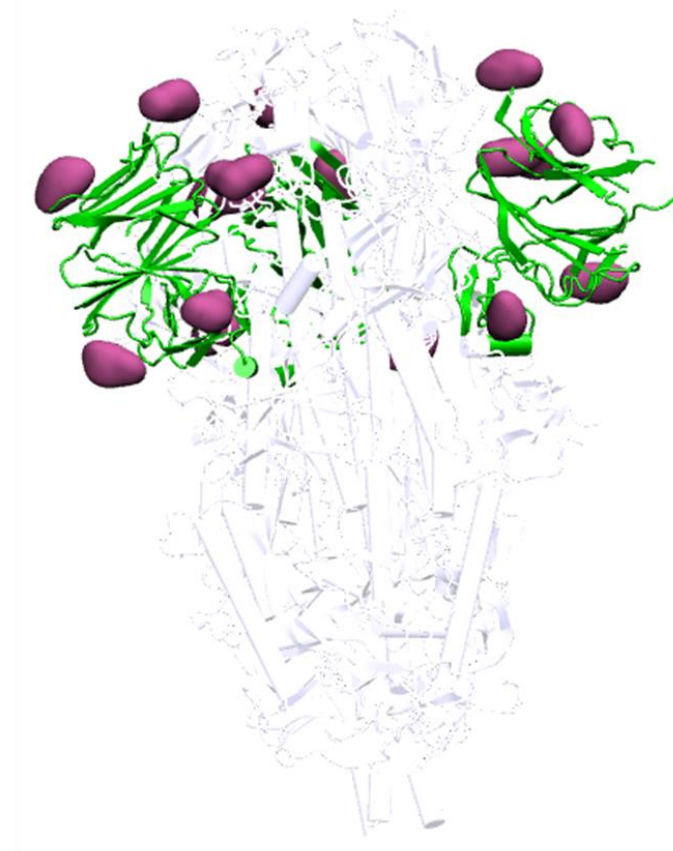

**Figure S3. The structure of S1 domain.** (a) Structure of S1 domain highlighting the N-Terminal Domain (in green) and Receptor Binding Domain (in red). (b) The orientation of N-acetyl glucosamine (NAG) residues around N-Terminal Domain in the crystal structure of Spike protein (PDB: 6VXX). The NAG residues are shown in surf mode and colored in pink, the N-Terminal Domain is shown in green

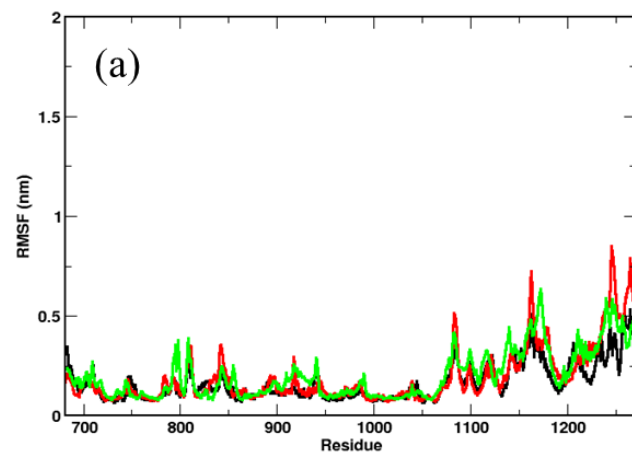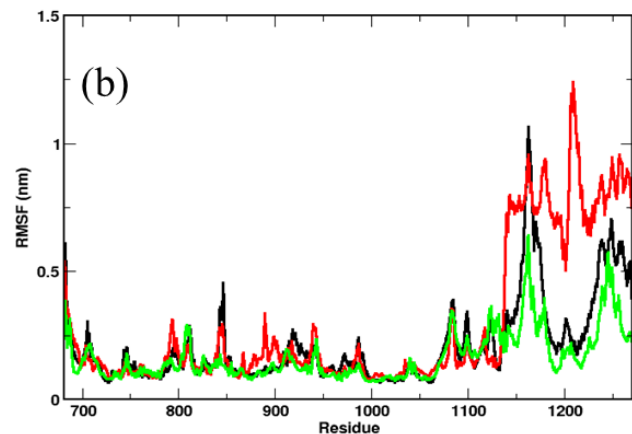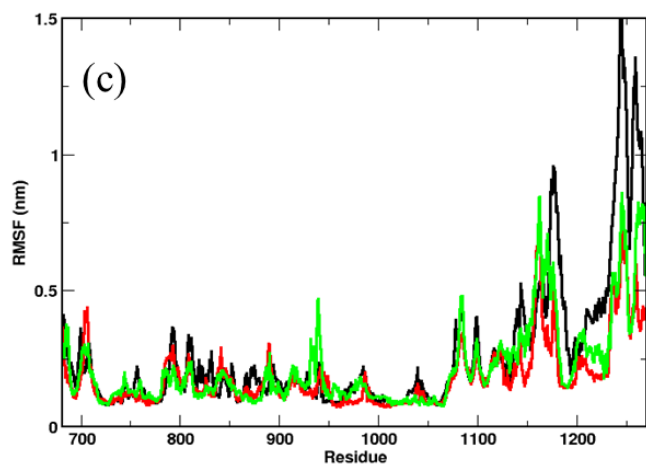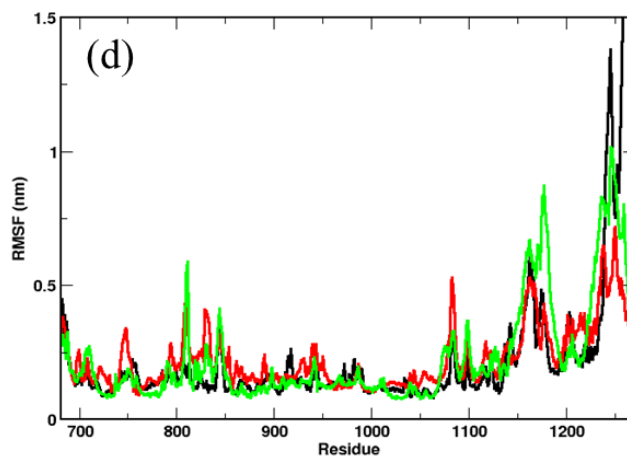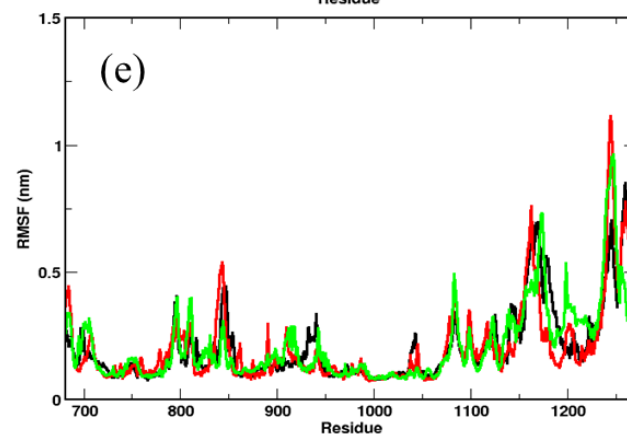

**Figure S5. Fluctuation of CA of individual chains at different temperatures.** RMSFs of the CA residues of S2 domain showing stability in residues spanning the transmembrane region. Fluctuations of chain A (in black), B (in red) and C (in green) are shown for temperatures (a) 10 °C, (b) 20 °C, (c) 30 °C, (d) 40 °C and (e) 50 °C



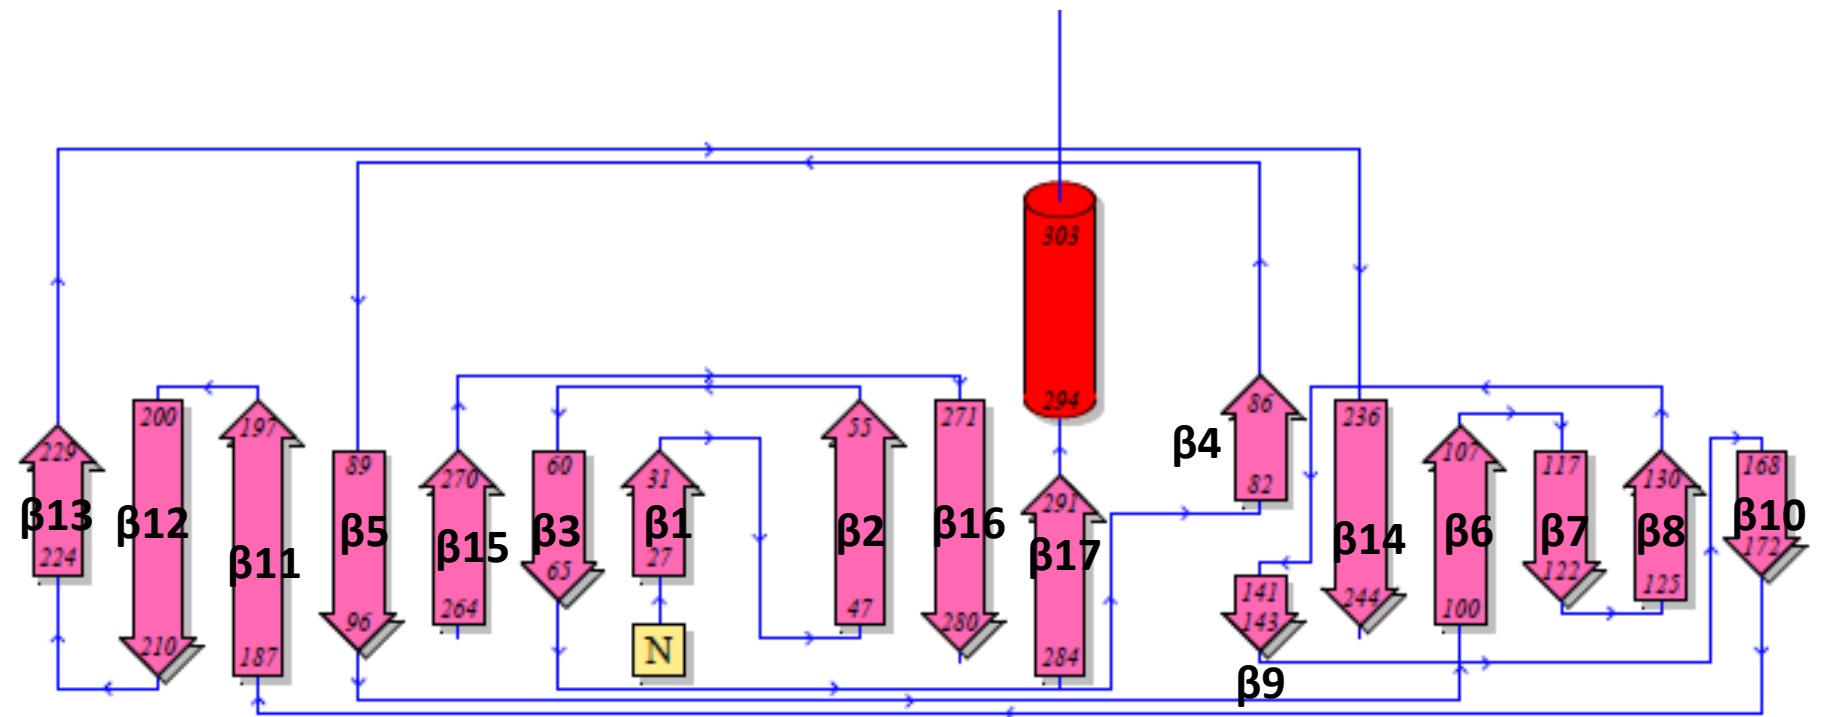

**Figure S6. Secondary structure of the N-Terminal Domain.** Topology of the N-Terminal Domain showing the three distinct layers of  $\beta$  sheet.  $\beta$  strands are colored in pink and  $\alpha$  helix in red. The beginning and end residues are shown. The structure is generated from the pdbsum online server using the crystal structure of Spike protein (PDB ID: 6VXX)

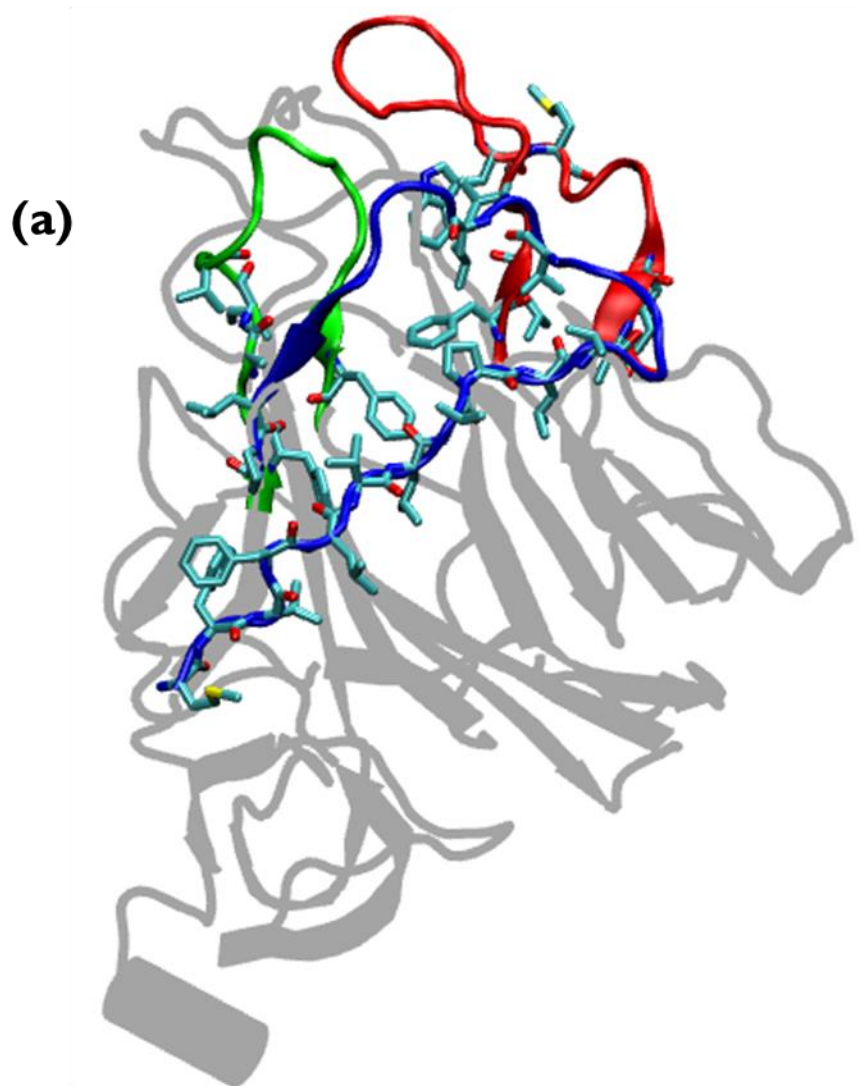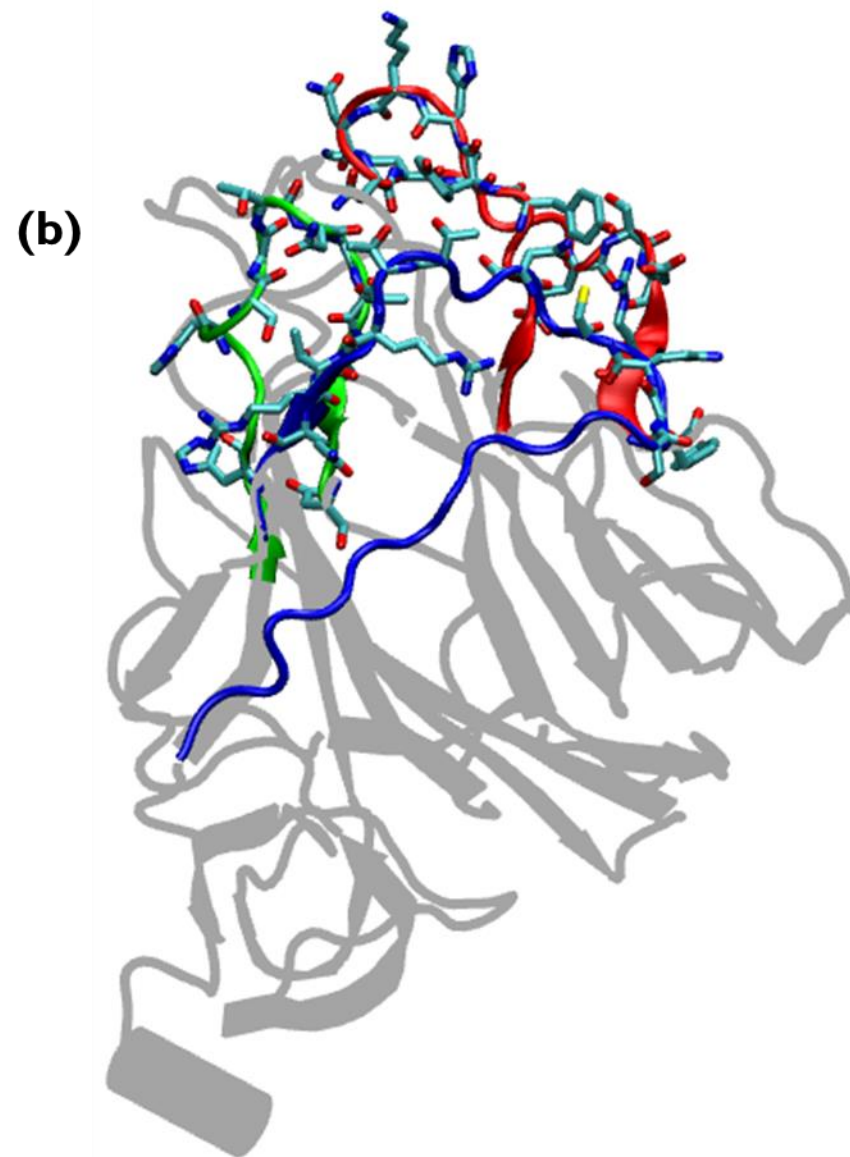

**Figure S6. Solvent exposed residues at 30 °C.** The time-averaged conformation of N-Terminal Domain at 30 °C showing the relative orientation of (a) hydrophobic and (b) polar residues near the solvent accessible surface. The residues are shown in licorice and colored by CPK

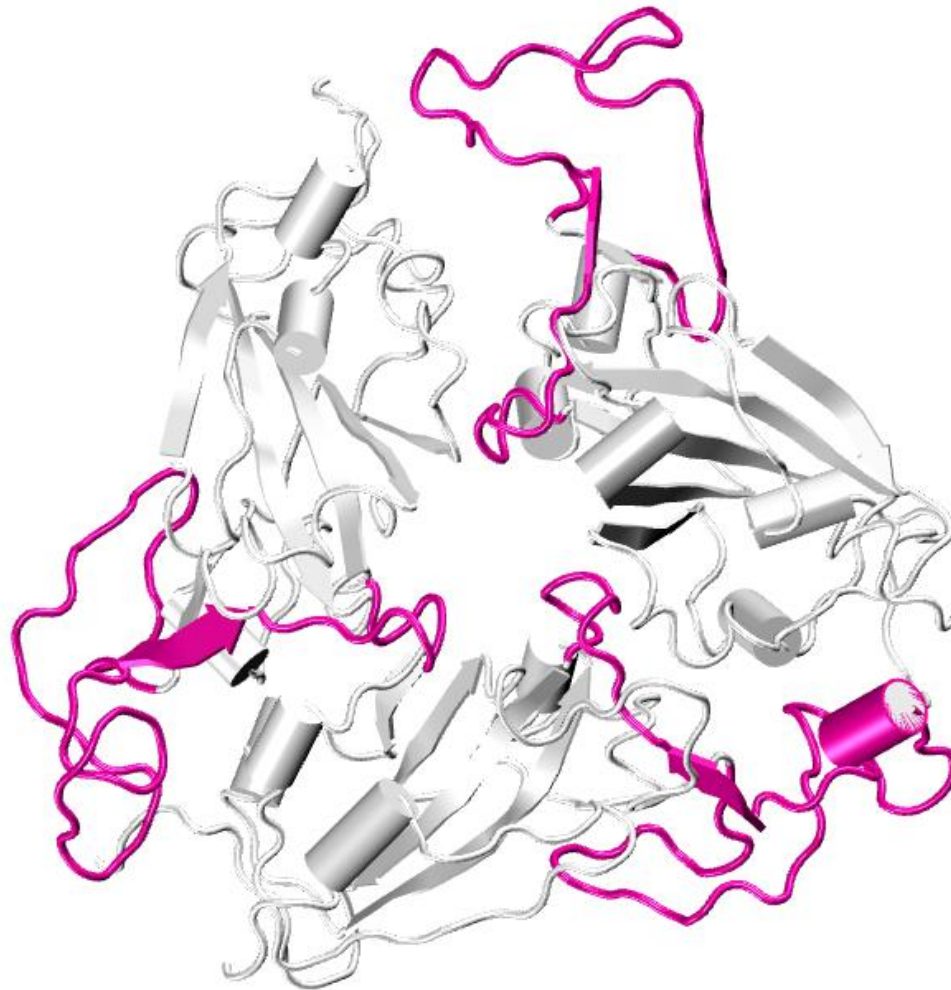

**Figure S7. Spike protein receptor binding motif at high temperature.** The time average conformation of the receptor binding motif highlighted in magenta at 70 °C after 100ns of simulation, showing the confined arrangement of loops
